# Supplementary material for: Nitrogen doped graphene nanosheet supported platinum nanoparticles as high performance electrochemical homocysteine biosensors
Source: Royal Society of Chemistry journal article supplement (doi:10.1039/c3tb20923g), 2013-01-01
Supplement: c3tb20923g.pdf [file c3tb20923g.pdf]

## Supporting Information

Nitrogen doped graphene nanosheets supported platinum nanoparticles as high performance electrochemical homocysteine biosensor

Palanisamy Kannan,<sup>\*a</sup> Thandavarayan Maiyalagan,<sup>\*b</sup> Nanda Gopal Sahoo,<sup>c</sup> and Marcin Opallo <sup>a</sup>

<sup>a</sup> Institute of Physical Chemistry, Polish Academy of Sciences  
44/52 ul. Kasprzaka, 01-224 Warszawa, Poland.

<sup>b</sup> Materials Science and Engineering Program  
204 E. Dean Keeton St, Stop C2200  
The University of Texas at Austin, Austin, TX78712, USA.

<sup>c</sup> Institute of Materials Research and Engineering  
3 Research link, Singapore 117602.

\*Corresponding authors: maiyalagan@gmail.com (Maiyalagan); ktpkannan@gmail.com (Kannan); Phone: +48 223 433 375; Fax: +48 223 433 333.

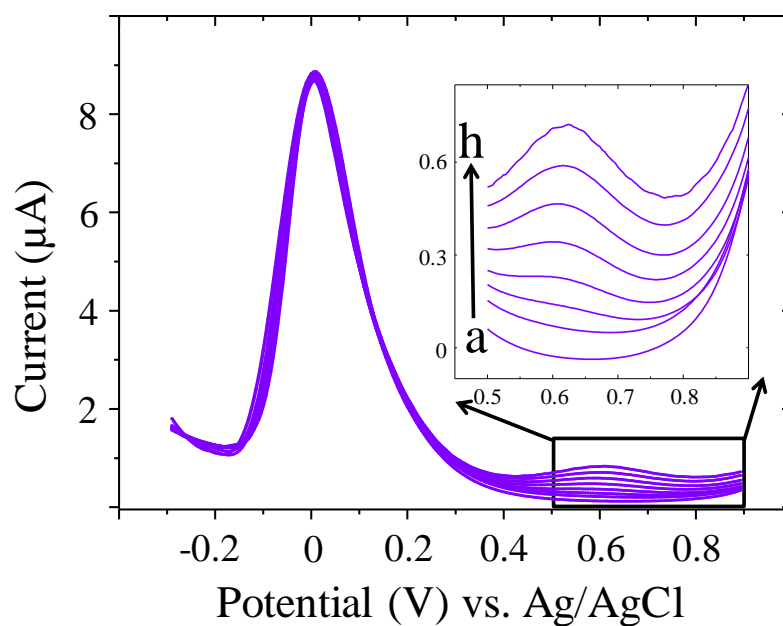

**Fig. S1** DPVs for the oxidation of HCY at GNs/PtNPs modified GC electrode in different concentrations (a) 0, (b) 10, (c) 20, (d) 30, (e) 40, (f) 50, (g) 60, and (h) 70  $\mu\text{M}$  in the presence of 0.2 mM of AA in 0.2 M PB solution. Pulse width = 0.05 s, amplitude = 0.05 V, sample period = 0.02 s and pulse period = 0.2 s.

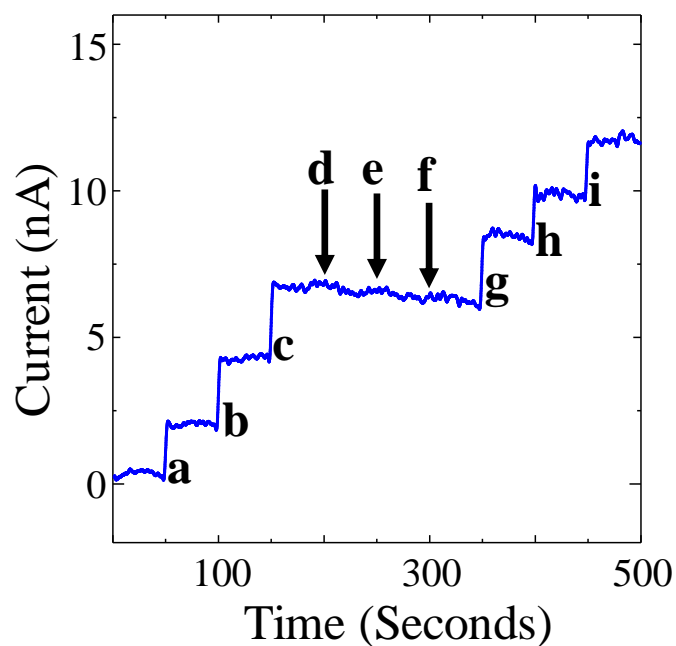

**Fig. S2** Amperometric  $i-t$  curve responses (at a constant working potential of +0.60 V vs Ag/AgCl) obtained for 2 nM HCY (a, b and c) and 1  $\mu$ M of dopamine (d), epinephrine (e) and L-dopa (f), then each addition was made for 2 nM HCY (g, h, and i) at N-GNs/PtNPs modified GC electrode in 0.2 M PB solution (pH=7.2) at a regular interval time of 50 s.

**Table S1** Detection limit of HCY is obtained at different chemically modified electrodes vs. N-GNs/PtNPs nanocomposites modified electrode.

| Modified Electrodes                                                                           | Detection Limit of HCY | References |
|-----------------------------------------------------------------------------------------------|------------------------|------------|
| Carbon-nanotube paste (CNTP) electrode                                                        | 4.6 $\mu\text{M}$      | 1          |
| Fluorosurfactant (i.e. Zonyl FSO)-modified gold electrode                                     | 5 $\mu\text{M}$        | 2          |
| Platinum/poly(methyl violet) (Pt/MV) chemically modified electrode                            | 10 $\mu\text{M}$       | 3          |
| Boron-doped diamond (BDD) thin film electrodes                                                | 1 nM                   | 4          |
| Colloidal gold-cysteamine-carbon paste electrode                                              | 30 nM                  | 5          |
| Carbon nanotube modified glassy carbon electrode                                              | 60 nM                  | 6          |
| Electropolymerized film of 2-amino-1,3,4-thiadiazole (p-ATD) modified glassy carbon electrode | 100 nM                 | 7          |
| Nitrogen doped graphene supported Pt nanoparticles modified glassy carbon electrode           | 200 pM                 | This work  |

## References

1. N. S. Lawrence, R. P. Deo and J. Wang, *Talanta*, 2004, **63**, 443-449.
2. Z. Chen and Y. Zu, *Journal of Electroanalytical Chemistry*, 2008, **624**, 9-13.
3. H. Xu, W. Zhang, W. Zhu, D. Wang, J. Ye, K. Yamamoto and L. Jin, *Analytica Chimica Acta*, 2005, **545**, 182-188.
4. O. Chailapakul, W. Siangproh, B. V. Sarada, C. Terashima, T. N. Rao, D. A. Tryk and A. Fujishima, *Analyst*, 2002, **127**, 1164-1168.
5. L. Agüí, C. Peña-Farfal, P. Yáñez-Sedeño and J. M. Pingarrón, *Talanta*, 2007, **74**, 412-420.
6. K. Gong, Y. Dong, S. Xiong, Y. Chen and L. Mao, *Biosensors and Bioelectronics*, 2004, **20**, 253-259.
7. P. Kalimuthu and S. A. John, *Bioelectrochemistry*, 2010, **79**, 168-172.

**Table S2.** Determination of HCY in human blood serum samples using N-GNs/PtNPs nanocomposite modified GC electrode<sup>a</sup>

|                                  | Blood Serum Sample 1 | Blood Serum Sample 2 | Blood Serum Sample 3 | Blood Serum Sample 4 |
|----------------------------------|----------------------|----------------------|----------------------|----------------------|
| Original value ( $\mu\text{M}$ ) | $50.1 \pm 0.1$       | $50.0 \pm 0.1$       | $50.1 \pm 0.1$       | $50.1 \pm 0.1$       |
| Spike ( $\mu\text{M}$ )          | 20                   | 20                   | 20                   | 20                   |
| After spike ( $\mu\text{M}$ )    | $70.20 \pm 0.1$      | $70.10 \pm 0.1$      | $70.23 \pm 0.1$      | $70.28 \pm 0.1$      |
| Recovery (%)                     | 99.8%                | 99.8%                | 99.7%                | 99.6%                |

<sup>a</sup>Four replicate measurements were made on the sample.
